# Supplementary material for: Serum elabela and apelin levels during different stages of chronic kidney disease
Source: PubMed Central journal article supplement (PMC7470108; doi:10.1080/0886022x.2020.1792926), 2020-07-25
Supplement: IRNF_A_1792926_SM5381.pdf [file IRNF_A_1792926_SM5381.pdf]

Table S1 The distribution of primary disease in stages of chronic kidney disease

|              | CKD1<br>(n=20) | CKD3<br>(n=20) | CKD5<br>(n=20) | P value |
|--------------|----------------|----------------|----------------|---------|
| CGN          | 10 (50%)       | 10 (50%)       | 11 (55%)       | 0.935   |
| Hypertension | 3 (15%)        | 4 (20%)        | 3 (15%)        | 0.889   |
| Diabetes     | 2 (10%)        | 3 (15%)        | 3 (15%)        | 0.860   |
| CPN          | 2 (10%)        | 2 (10%)        | 1 (5%)         | 0.789   |
| SLE          | 2 (10%)        | 1 (5%)         | 1 (5%)         | 0.776   |
| HSP          | 1 (5%)         | 0 (0%)         | 1 (5%)         | 0.437   |

CKD,chronic-kidney-disease;CGN,chronic glomerulonephritis;CPN,chronic pyelonep

hritis;SLE, systemic lupus erythematosus;HSP,henoch-schonlein purpura
